# Supplementary material for: Applying double-cropping and interactive irrigation in the North China Plain using WRF4.5
Source: Copernicus journal article supplement (doi:10.5194/gmd-2024-38), 2024-03-22
Supplement: Supplementary file 1 [file gmd-2024-38-supplement.pdf]

## Supplementary

**Table S1.** Parameter setting for spring maize and summer maize.

|  |                                                                     |
|--|---------------------------------------------------------------------|
|  | Same as the parameter for one-year corn from X. Liu et al. (2016)   |
|  | Same as the parameter for one-year corn from Z. Zhang et al. (2020) |
|  | Same as the parameter for spring wheat from Z. Zhang et al. (2023)  |
|  | Based on winter wheat study from Y. Zhang et al. (1991)             |
|  | Recalibrated with the station/satellite data                        |

| Parameter           | Maize  |        | Wheat<br>Winter | Physical meaning                                   |
|---------------------|--------|--------|-----------------|----------------------------------------------------|
|                     | Spring | Summer |                 |                                                    |
| GDDTBASE            | 10     |        | 0               | Base temperature for GDD accumulation              |
| GDDTCUT             | 30     |        | 30              | Upper temperature for GDD accumulation             |
| GDDS1               | 50     |        | 150             | GDD from seeding to emergence                      |
| GDDS2               | 625    |        | 790             | GDD from seeding to initial vegetative             |
| GDDS3               | 1000   |        | 1190            | GDD from seeding to post vegetative                |
| GDDS4               | 1103   |        | 1600            | GDD from seeding to initial reproductive           |
| GDDS5               | 1555   |        | 2010            | GDD from seeding to physical maturity              |
| C3PSN               | 0      |        | 1               | Indicator for C3 plant (1) or C4 plant (0)         |
| KC25                | 30     |        | 30              | CO <sub>2</sub> Michaelis-Menten constant at 25 °C |
| AKC                 | 2.1    |        | 2.1             | Q10* base for KC25                                 |
| KO25                | 3.E4   |        | 3.E4            | CO <sub>2</sub> Michaelis-Menten constant at 25 °C |
| AKO                 | 1.2    |        | 1.2             | Q10* base for KO25                                 |
| AVCMX               | 2.4    |        | 1.5             | Q10* base for VCMX25                               |
| VCMX25              | 60     |        | 80              | Maximum rate of carboxylation at 25 °C             |
| BP                  | 4.E3   |        | 1.E4            | Minimum leaf conductance                           |
| MP                  | 4      |        | 9               | Slope of conductance-to-photosynthesis             |
| QE25 <sup>(1)</sup> | 0.08   |        | 0.12            | Quantum efficiency at 25 °C                        |
| Q10MR               | 2.0    |        | 2.0             | Q10* base for maintenance respiration              |
| LEFREEZ             | 268    |        | 268             | characteristic T for leaf freezing                 |
| DILE_FC_S5          | 0.5    |        | 0.5             | Coefficient for temperature leaf stress death      |
| DILE_FC_S6          | 0.5    |        | 0.5             |                                                    |
| DILE_FW_S5          | 0.2    |        | 0.2             | Coefficient for water leaf stress death            |
| DILE_FW_S6          | 0.2    |        | 0.2             |                                                    |
| FRA_GR              | 0.2    |        | 0.2             | Fraction of growth respiration                     |
| LF_OVRC_S5          | 0.2    |        | 0.05            | Fraction of leaf turnover                          |
| LF_OVRC_S6          | 0.3    |        | 0.05            |                                                    |
| ST_OVRC_S5          | 0.12   |        | 0.05            | Fraction of stem turnover                          |
| ST_OVRC_S6          | 0.06   |        | 0.05            |                                                    |
| RT_OVRC_S5          | 0.12   |        | 0.12            | Fraction of root turnover                          |
| RT_OVRC_S6          | 0.06   |        | 0.06            |                                                    |

|                        |       |       |        |                                               |
|------------------------|-------|-------|--------|-----------------------------------------------|
| LFMR25                 | 0.8   |       | 0.8    | Leaf maintenance respiration at 25 °C         |
| STMR25                 | 0.05  |       | 0      | Stem maintenance respiration at 25 °C         |
| RTMR25                 | 0.05  |       | 0      | Root maintenance respiration at 25 °C         |
| LFPT_S3                | 0.36  | 0.4   | 0.45   | Fraction of carbohydrate flux to leaf         |
| LFPT_S4                | 0.2   | 0.3   | 0.55   |                                               |
| LFPT_S5                | 0.1   |       | 0      |                                               |
| LFPT_S6                | 0.1   |       | 0      |                                               |
| STPT_S3                | 0.24  | 0.2   | 0.4    | Fraction of carbohydrate flux to stem         |
| STPT_S4                | 0.5   | 0.2   | 0.45   |                                               |
| STPT_S5                | 0.4   | 0.3   | 0.4    |                                               |
| STPT_S6                | 0     | 0.2   | 0.3    |                                               |
| RTPT_S3                | 0.4   | 0.3   | 0.15   | Fraction of carbohydrate flux to root         |
| RTPT_S4                | 0.3   | 0.5   | 0.0    |                                               |
| RTPT_S5                | 0.2   | 0.2   | 0.1    |                                               |
| RTPT_S6                | 0.1   | 0     | 0.1    |                                               |
| GRAINPT_S5             | 0.4   | 0.4   | 0.5    | Fraction of carbohydrate flux to grain        |
| GRAINPT_S6             | 0.8   | 0.7   | 0.6    |                                               |
| LFCT_S6 <sup>(2)</sup> | 0     |       | 0.0005 | Carbohydrate translocation from leaf to grain |
| STCT_S6 <sup>(2)</sup> | 0     |       | 0.001  | Carbohydrate translocation from stem to grain |
| BIO2LAI <sup>(3)</sup> | 0.023 | 0.020 | 0.008  | Leaf area per living leaf biomass             |

\*Q10 means the rate increases by a 10°C temperature increases

5 <sup>(1)</sup> The QE25 parameter is increased following the removal of the great-overestimated and non-water-sensitive assumption 'FVEG=0.95'. This removal significantly decreases the radiation intercepted by vegetation, consequently imposing light limitations when calculating photosynthesis. Since the crop model adopts the same photosynthesis function as other non-crop vegetation in the Noah-MP, for simplicity, we opt to raise the crop quantum efficiency to achieve higher photosynthesis without affecting other vegetation types.

10 <sup>(2)</sup> Carbohydrate translocation from leaf and stem to grain, which typically occurs during the reproductive stages, has been sometimes overlooked. However, we found it is necessary to include it when predicting the wheat yield in the highly productive NCP (Huang et al., 2020; Ma et al., 2006).

15 <sup>(3)</sup> The average station BIO2LAI is calculated to be 0.02 for maize and 0.01 for winter wheat approximately. However, the BIO2LAI varies a lot during different stages and different quadrats, which requires slight recalibration around that station value. The final 0.023 for spring maize is similar to the 0.025 calibrated by (Yu et al., 2022) in northeast China.

### The recalibration process:

20 The recalibration starts from crop-stage identification, since it relies purely on the accumulated GDD and is less affected by other crop parameters. The GDD-related parameters are retrieved from Z. Zhang et al. (2020) and Zhang et al. (1991), and then validated with the heading date and maturity date retrieved from the satellite data (Luo et al., 2020). The crop stage comprises the pre-planting stage, three vegetative stages (emergence, initial vegetative, post-vegetative), two reproductive stages (initial reproductive, post-reproductive), and finally, one maturity stage. During the vegetative stage, a majority of carbohydrates are allocated to the leaves and stems, while in the reproductive stage, the allocation shifts towards the grain.

Next, the general growth rate including BIO2LAI can be extracted from the station data, and the Maximum rate of carboxylation at 25 °C (VCMX25) can also be estimated using the monthly satellite data of Gross Primary Product (GPP) and LAI, since the photosynthesis rate and the LAI are approximately linearly related, especially on sunny days when the canopy temperature is around 25°C (He et al., 2023). Instead of the linearly interpolated data from WRF pre-processing, both GPP and LAI that we adopted are initially derived from MODIS products but have undergone further post-processing to generate a more continuous monthly pattern (Wang et al., 2020; Yuan et al., 2020), and will be considered as the observation (OBS). Furthermore, the AVCMX, which represents the crop sensitivity to the temperature, can be determined by the gradient of biomass accumulation (Huang et al., 2022), especially in spring and autumn with greater temperature changes. For maize, the values of VCMX25 and AVCMX have simply followed the previous studies, while BIO2LAI is subject to recalibration, as its necessity of recalibration has been demonstrated by Yu et al. (2022).

Following the establishment of the general photosynthesis rate, we proceed to fine-tune the distribution of carbohydrates among the leaf, stem, and grain compartments, based on the annual cycle of leaf mass and stem data obtained from the station data. Any remaining carbohydrates are allocated to the root. In cases where the recalibration of the distribution scheme alone does not yield satisfactory predictions, adjustments to the turnover and translocation rates are implemented. Additionally, the crop yield will be validated through comparisons with remotely sensed estimations from Gorgan et al. (2022).

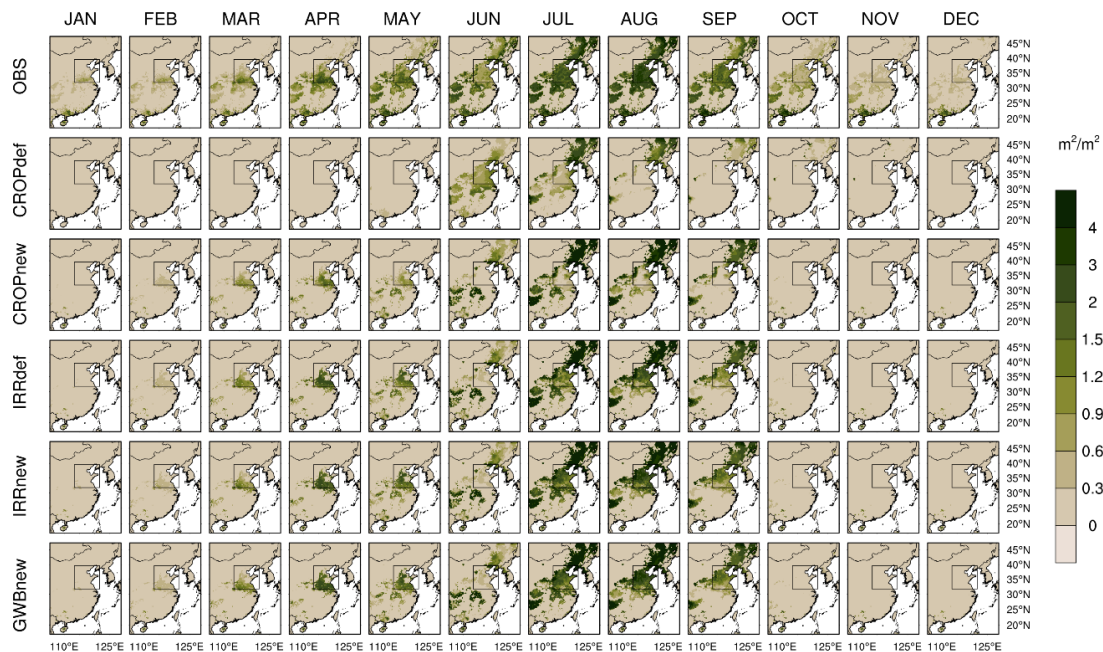

**Figure S1.** Monthly LAI pattern of the satellite observation, default crop model only, and after all modification and integration.

40 This is an extended version of Fig. 8.

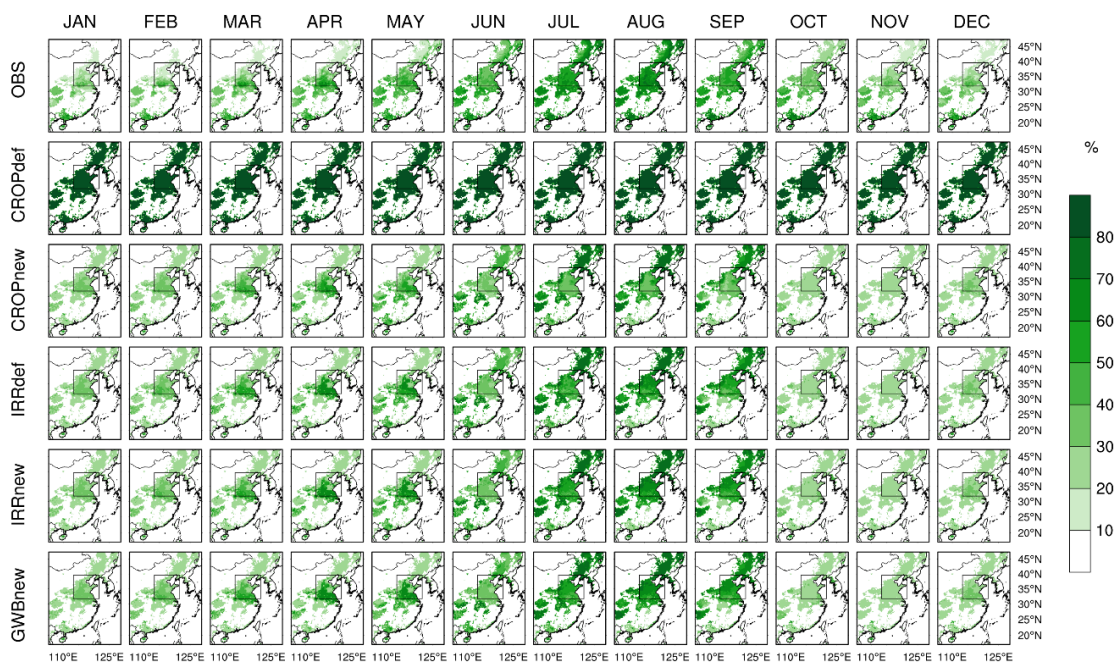

**Figure S2.** Similar to Fig. S1 but for FVEG. Notice that in the default crop model (CROPdef) all FVEG is fixed to 95%.
